# Supplementary material for: Long-term aspirin administration suppresses inflammation in diabetic cystopathy
Source: publisher site journal article supplement (doi:10.18632/aging.205021), 2023-09-12
Supplement: Supplementary file [file aging-v15i17-205021-supplementary-material-SD1.pdf]

SUPPLEMENTARY FIGURES

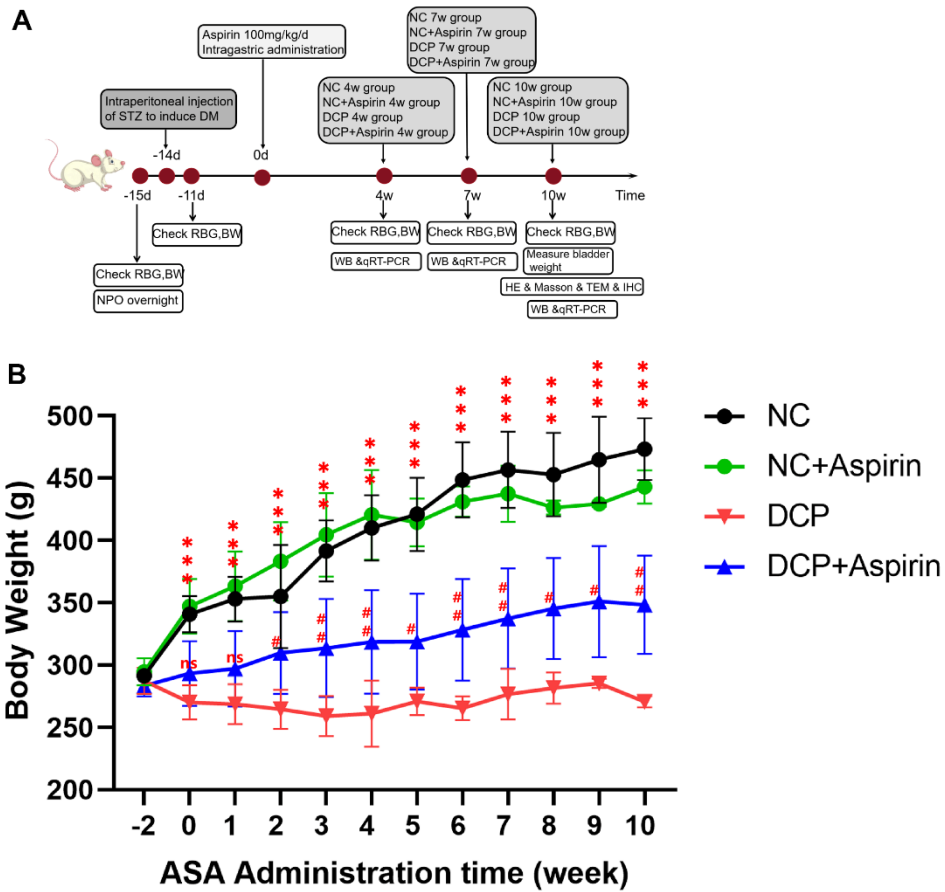

**Supplementary Figure 1.** (A) The detailed flowsheet of the experimental design (B) The line chart of body weight displays trend over time. Data were presented as mean ± SD. (ns, no significant; \*/#, P < 0.05; \*\*/###, P < 0.01; \*\*\*/####, P < 0.001; \*, NC vs DCP; #, DCP vs DCP+Aspirin).

**A**

| Groups (mean±SD) | 4W         | 7W         | 10W        |
|------------------|------------|------------|------------|
| NC               | 16.39±0.49 | 16.17±0.39 | 16.72±0.46 |
| NC+Aspirin       | 16.48±0.32 | 16.48±0.32 | 16.47±0.68 |
| DCP              | 16.24±0.28 | 16.18±0.55 | 16.47±0.89 |
| DCP+Aspirin      | 16.22±0.40 | 15.99±0.37 | 16.52±0.73 |

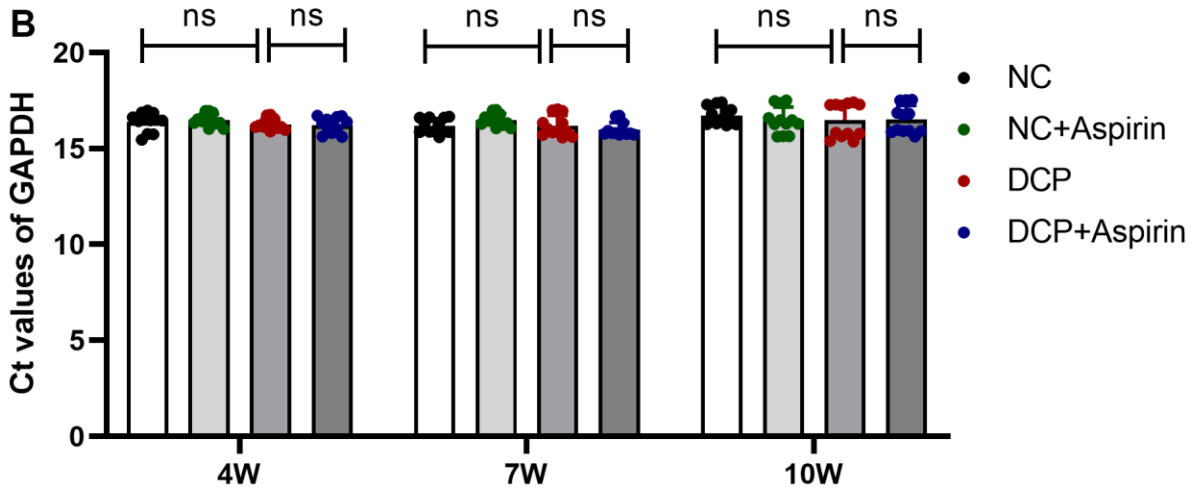

**Supplementary Figure 2. Stability of reference gene GAPDH in mRNA analysis of rat bladder.** (A) Ct values of GAPDH were presented as mean ± SD. (B) Statistical analysis of GAPDH expression. n=12. N=6. (ns, no significant; NC vs DCP; DCP vs DCP+Aspirin).

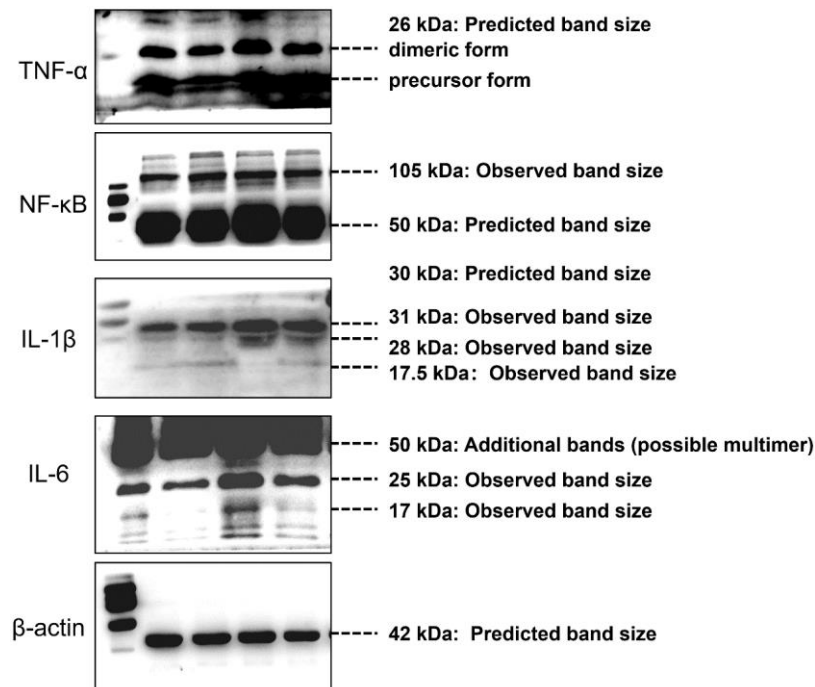

**Supplementary Figure 3. The original Western blot bands show a detailed characterization demonstrating the specificity of the antibody and the range of reactivity of the reagent in the assay.**
